# Supplementary material for: Attenuation of cancer proliferation by suppression of glypican-1 and its pleiotropic effects in neoplastic behavior
Source: PubMed Central journal article supplement (PMC10030152; doi:10.18632/oncotarget.28388), 2023-03-21
Supplement: oncotarget-14-28388-s001.pdf [file oncotarget-14-28388-s001.pdf]

# Attenuation of cancer proliferation by suppression of glypican-1 and its pleiotropic effects in neoplastic behavior

## SUPPLEMENTARY MATERIALS

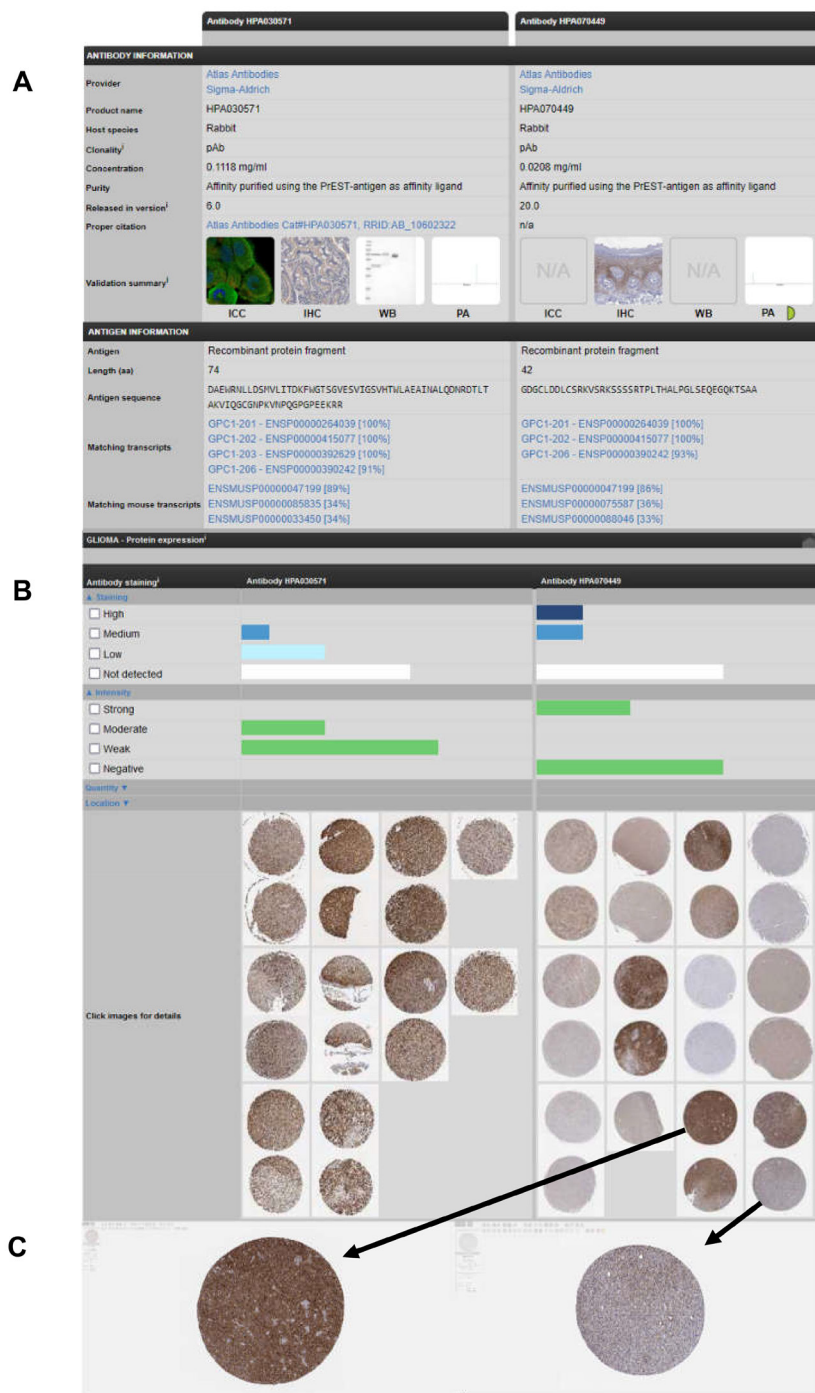

**Supplementary Figure 1: Data from The human protein atlas shows difference in detection levels for two different GPC1 antibodies in biopsy samples from malignant glioma patients [1]. (A) Antibody data and antigen information for two different GPC1 antibodies (<https://www.proteinatlas.org/ENSG00000063660-GPC1/summary/antibody>). (B) Variations in detection levels for the two different GPC1 antibodies in biopsies from the same cancer type i.e., malignant glioma cancer. (C) Variations in detection levels for the same antibody in biopsies from the same cancer type (malignant glioma cancer).**

## Supplementary Table 1: List of significant (adjusted $p < 0.05$ ) canonical pathways enrichment results

| Ingenuity Canonical Pathways                                  | $-\log(p\text{-value})$ | zScore     | Ratio  | GeneNames                                               | P-value    | Adj. p-value |
|---------------------------------------------------------------|-------------------------|------------|--------|---------------------------------------------------------|------------|--------------|
| Wound Healing Signaling Pathway                               | 9.12                    | -2.5298221 | 0.0397 | COL11A1,COL1A1,COL1A2,COL22A1,COL5A1,COL6A1,COL6A2,COL8 | 7.5858E-10 | 4.4778E-08   |
| GP6 Signaling Pathway                                         | 8.94                    | -2.1213203 | 0.063  | COL11A1,COL1A1,COL1A2,COL22A1,COL5A1,COL6A1,COL6A2,COL8 | 1.1482E-09 | 4.4778E-08   |
| Hepatic Fibrosis/Hepatic Stellate Cell Activation             | 7.49                    |            | 0.0412 | COL11A1,COL1A1,COL1A2,COL22A1,COL5A1,COL6A1,COL6A2,COL8 | 3.2359E-08 | 8.4134E-07   |
| Neutrophil Extracellular Trap Signaling Pathway               | 7.08                    | 2.52982213 | 0.0242 | COL11A1,COL1A1,COL1A2,COL22A1,COL5A1,COL6A1,COL6A2,COL8 | 8.3176E-08 | 1.2976E-06   |
| Role Of Osteoclasts In Rheumatoid Arthritis Signaling Pathway | 7.08                    | -1.6666667 | 0.0291 | COL11A1,COL1A1,COL1A2,COL22A1,COL5A1,COL6A1,COL6A2,COL8 | 8.3176E-08 | 1.2976E-06   |
| Pulmonary Fibrosis Idiopathic Signaling Pathway               | 6.88                    | -2.3333333 | 0.0276 | COL11A1,COL1A1,COL1A2,COL22A1,COL5A1,COL6A1,COL6A2,COL8 | 1.3183E-07 | 1.7137E-06   |
| Pathogen Induced Cytokine Storm Signaling Pathway             | 5.36                    | -2.1213203 | 0.0216 | COL11A1,COL1A1,COL1A2,COL22A1,COL5A1,COL6A1,COL6A2,COL8 | 4.3652E-06 | 4.864E-05    |
| IL-4 Signaling                                                | 3.99                    | -2.1213203 | 0.0139 | COL11A1,COL1A1,COL1A2,COL22A1,COL5A1,COL6A1,COL6A2,COL8 | 0.00010233 | 0.00099771   |
| Apelin Liver Signaling Pathway                                | 2.67                    |            | 0.0741 | COL1A1,COL1A2                                           | 0.00213796 | 0.018529     |
| Intrinsic Prothrombin Activation Pathway                      | 2.29                    |            | 0.0476 | COL1A1,COL1A2                                           | 0.00512861 | 0.04000319   |

## SUPPLEMENTARY REFERENCE

- Uhlen M, Zhang C, Lee S, Sjöstedt E, Fagerberg L, Bidkhori G, Benfeitas R, Arif M, Liu Z, Edfors F, Sanli K, von Feilitzen K, Oksvold P, et al. A pathology atlas of the human cancer transcriptome. Science. 2017; 357:eaan2507. <https://doi.org/10.1126/science.aan2507>. [PubMed]
